---

# Erratum

American Diabetes Association. Diabetes care in the school and day care setting (Position Statement). *Diabetes Care* 2012;35(Suppl. 1):S76–S80

In the print version of the article listed above, the link to the resource guide “Helping the Student with Diabetes Succeed: A Guide for School Personnel,” National Diabetes Education Program, 2010 is incorrect. On page S78, the link should have been <http://ndep.nih.gov/publications/PublicationDetail.aspx?PubId=97#main>. In addition, reference 3 should have read as follows: National Institutes of Health: *Helping the Student with Diabetes Succeed: A Guide for School Personnel*. Bethesda, MD, National Diabetes Education Program (NIH publication no. 10-5217, revised September 2010). The online version reflects these changes.
